# Supplementary material for: m6A-lncRNA landscape highlights reduced levels of m6A modification in glioblastoma as compared to low-grade glioma
Source: Springer Nature journal article supplement (doi:10.1186/s10020-025-01254-x), 2025-05-17

Steponaitis et al. Comprehensive analysis of the m6A-lncRNA axis identifies glioma subtypes and relatively fewer lncRNA m6A modification sites in glioblastoma

**Table St1.** Clinical and phenotypical characteristics of glioma data sets: LGG vs GBM, and C1 vs C2. P-values were calculated were appropriate. Medians were compared using nonparametric independent samples Fisher’s exact test, while categorical variables distribution between groups was tested by Pearson chi-square test. CL (classical), PN (proneural), MES (mesenchymal).

|                                             |                  | LGG              | GBM              | p-value          | C1               | C2                | p-value      |
|---------------------------------------------|------------------|------------------|------------------|------------------|------------------|-------------------|--------------|
| Number of patients                          | 26               | 9                | 17               | -                | 19               | 7                 | -            |
| Age median (min to max)                     | 61.6 (24.2-85.4) | 33.4 (24.2-71.6) | 67.8 (50.1-85.4) | 0.09             | 64.5 (24.2-85.4) | 47.7 (26.9-78.0)  | 0.38         |
| Gender                                      | Male             | 3                | 7                | 0.69             | 7                | 3                 | 0.77         |
|                                             | Female           | 6                | 10               |                  | 12               | 4                 |              |
| Tumor size median (min to max)              |                  | 116.6 (38.5-171) | 50.4 (7.3-293.2) | 0.41             | 96.8 (7.3-293.2) | 60.5 (38.5-247.5) | 0.96         |
| Tumor location                              | Cerebellum       | 2                | 1                | 0.1              | -                | 3                 | <b>0.004</b> |
|                                             | Frontal lobe     | 3                | 3                |                  | 5                | 1                 |              |
|                                             | Frontotemporal   | 2                | -                |                  | -                | 2                 |              |
|                                             | Occipital lobe   | -                | 2                |                  | 2                | -                 |              |
|                                             | Parietal lobe    | -                | 2                |                  | 2                | -                 |              |
|                                             | Temporal lobe    | 2                | 9                |                  | 10               | 1                 |              |
| Tumor subtype                               | CL               | -                | 9                | -                | 8                | 1                 | 0.09         |
|                                             | PN               | -                | 4                |                  | 4                | -                 |              |
|                                             | MES              | -                | 4                |                  | 3                | 1                 |              |
| MGMT methylated                             | Yes              | 6                | 8                | 0.43             | 10               | 4                 | 1            |
|                                             | No               | 3                | 9                |                  | 9                | 3                 |              |
| IDH1 mutated                                | Yes              | 8                | 0                | <b>0.001</b>     | 4                | 4                 | 0.15         |
|                                             | No               | 1                | 17               |                  | 15               | 3                 |              |
| Ki-67                                       | Low              | 9                | 3                | <b>0.001</b>     | 1                | 6                 | <b>0.03</b>  |
|                                             | High             | -                | 14               |                  | 18               | 1                 |              |
| Overall median (min to max) survival (days) |                  | 3093 (1192-3829) | 290 (32-2215)    | <b>&lt;0.001</b> | 426 (32-3829)    | 1256 (253-3537)   | 0.07         |

Steponaitis et al. m6A-LncRNA Landscape Highlights Reduced Levels of m6A Modification in Glioblastoma as Compared to Low-Grade Glioma

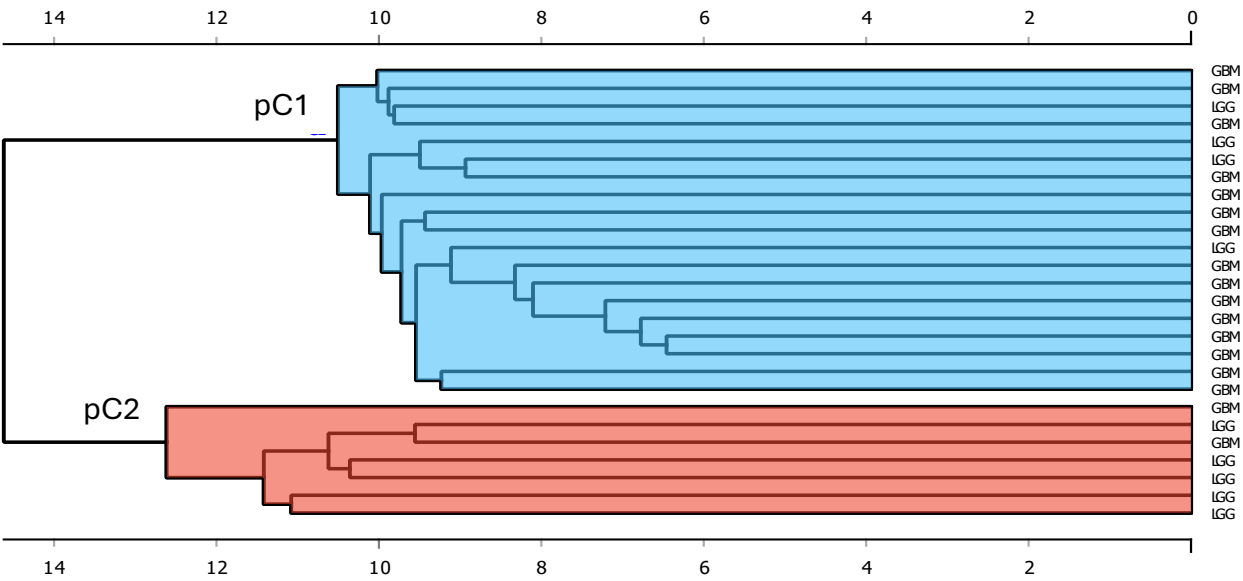

**Fig. S1.** Hierarchical clustering dendrogram of the glioma m6A modified lncRNA profile dataset, using adenine methylation status data from 442 lncRNA RRACHs.

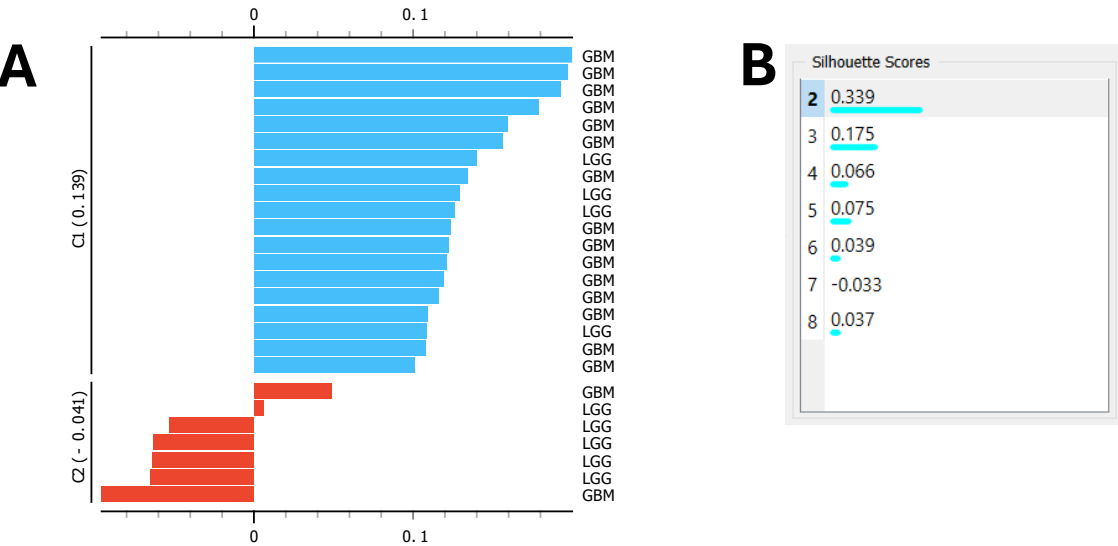

**Fig. S2.** (A) Silhouette analysis of clustering applying 442 RRACH information. (B) k-Means clustering analysis Silhouette scores for different numbers of clusters. The analysis showed optimal number of clusters.

**Table St2.** Features (RRACHs) table after feature selection (ranking) applying chi-square ( $\chi^2$ ) scoring. Colors indicates top lncRNAs RRACHs based on p-value threshold (green  $p < 0,005$ ; white –  $p < 0,01$ ; grey –  $p > 0,05$ )

| No | Feature                                     | $\chi^2$ | p-value  |
|----|---------------------------------------------|----------|----------|
| 1  | ENST00000497824_GGACA_364_MIR9-1HG          | 16,8596  | 0,00004  |
| 2  | ENST00000557682_AGACT_565_CHASERR           | 16,5188  | 0,000048 |
| 3  | ENST00000371743_GGACA_835_ZFAS1             | 12,2975  | 0,000454 |
| 4  | ENST00000424349_AGACT_3626_FGD5-AS1         | 11,8304  | 0,000583 |
| 5  | ENST00000557682_AGACA_685_CHASERR           | 11,73    | 0,000615 |
| 6  | ENST00000475947_AGACA_736_SNHG29            | 11,1218  | 0,000853 |
| 7  | ENST00000565493_AGACA_4413_NORAD            | 9,70426  | 0,001838 |
| 8  | ENST00000659090_GAACA_600_GIHCG             | 9,05388  | 0,002621 |
| 9  | ENST00000593427_GAACC_4157_ENSG00000268205  | 8,79301  | 0,003024 |
| 10 | ENST00000500949_GAACA_8215_OIP5-AS1         | 8,79301  | 0,003024 |
| 11 | ENST00000441722_GGACC_592_ZFAS1             | 8,14286  | 0,004323 |
| 12 | ENST00000565493_GGACT_4735_NORAD            | 8,14286  | 0,004323 |
| 13 | ENST00000565493_AAACCT_4630_NORAD           | 8,14286  | 0,004323 |
| 14 | ENST00000450589_AGACA_163_GAS5              | 8,01353  | 0,004643 |
| 15 | ENST00000450589_GGACT_356_GAS5              | 7,53589  | 0,006048 |
| 16 | ENST00000557682_AGACA_867_CHASERR           | 7,22556  | 0,007187 |
| 17 | ENST00000557682_GAACC_643_CHASERR           | 7,22556  | 0,007187 |
| 18 | ENST00000411630_GAACC_178_DANCR             | 7,22556  | 0,007187 |
| 19 | ENST00000411630_GGACA_536_DANCR             | 7,22556  | 0,007187 |
| 20 | ENST00000620266_AAACCT_2755_ENSG00000278730 | 7,22556  | 0,007187 |
| 21 | ENST00000371743_AGACA_615_ZFAS1             | 7,1594   | 0,007457 |
| 22 | ENST00000557682_GGACC_474_CHASERR           | 7,1594   | 0,007457 |
| 23 | ENST00000581621_GGACT_2018_ENSG00000264772  | 7,04726  | 0,007939 |
| 24 | ENST00000465270_AAACCT_300_MIR9-1HG         | 7,04726  | 0,007939 |
| 25 | ENST00000430245_GGACT_447_GAS5              | 6,99436  | 0,008177 |
| 26 | ENST00000499521_GAACT_8468_ENSG00000230551  | 6,99436  | 0,008177 |
| 27 | ENST00000602520_GAACA_96_SNHG8              | 6,49839  | 0,010797 |
| 28 | ENST00000554133_AGACA_1531_CHASERR          | 6,49839  | 0,010797 |
| 29 | ENST00000557682_GGACC_388_CHASERR           | 6,38267  | 0,011524 |
| 30 | ENST00000310027_GGACC_492_MIR9-1HG          | 5,84918  | 0,015584 |
| 31 | ENST00000657986_AAACCT_3505_SOX2-OT         | 5,84918  | 0,015584 |
| 32 | ENST00000581621_AAACA_2185_ENSG00000264772  | 5,5609   | 0,018366 |
| 33 | ENST00000563192_AAACCT_255_SNHG19           | 5,5609   | 0,018366 |
| 34 | ENST00000441722_AGACT_887_ZFAS1             | 5,42857  | 0,01981  |
| 35 | ENST00000565493_GGACA_4694_NORAD            | 5,42857  | 0,01981  |
| 36 | ENST00000653276_GGACT_119_SNHG7             | 5,41353  | 0,01998  |
| 37 | ENST00000371743_GAACC_676_ZFAS1             | 5,31779  | 0,021109 |
| 38 | ENST00000501122_GAACT_3644_NEAT1            | 5,14662  | 0,023292 |
| 39 | ENST00000653276_GGACC_529_SNHG7             | 5,10788  | 0,023817 |
| 40 | ENST00000602520_AGACT_126_SNHG8             | 4,81704  | 0,02818  |
| 41 | ENST00000581621_GGACC_2045_ENSG00000264772  | 4,78947  | 0,028634 |
| 42 | ENST00000513560_GAACC_3922_NNT-AS1          | 4,78947  | 0,028634 |
| 43 | ENST00000505030_AAACA_3583_LINC00461        | 4,57179  | 0,032503 |
| 44 | ENST00000417721_AGACA_615_ZFAS1             | 4,57179  | 0,032503 |
| 45 | ENST00000500949_AGACT_8093_OIP5-AS1         | 4,57179  | 0,032503 |
| 46 | ENST00000591501_AAACCT_1889_ILF3-DT         | 4,57179  | 0,032503 |
| 47 | ENST00000651844_AGACA_7646_COPG2IT1         | 4,53067  | 0,033293 |
| 48 | ENST00000653163_AGACA_846_CHASERR           | 4,33083  | 0,037428 |
| 49 | ENST00000371743_GGACC_592_ZFAS1             | 4,26589  | 0,038885 |
| 50 | ENST00000557682_AAACCT_650_CHASERR          | 4,26589  | 0,038885 |
| 51 | ENST00000475947_GGACT_839_SNHG29            | 4,26589  | 0,038885 |
| 52 | ENST00000623091_GGACA_1603_HEIH             | 4,26589  | 0,038885 |
| 53 | ENST00000593427_GAACA_3674_ENSG00000268205  | 4,0368   | 0,044518 |
| 54 | ENST00000656289_GAACT_310_ENSG00000225792   | 4,0368   | 0,044518 |
| 55 | ENST00000581621_AGACA_1864_ENSG00000264772  | 3,84005  | 0,050042 |
| 56 | ENST00000610119_GAACA_384_ENSG00000272755   | 3,84005  | 0,050042 |

Steponaitis et al. m6A-LncRNA Landscape Highlights Reduced Levels of m6A Modification in Glioblastoma as Compared to Low-Grade Glioma

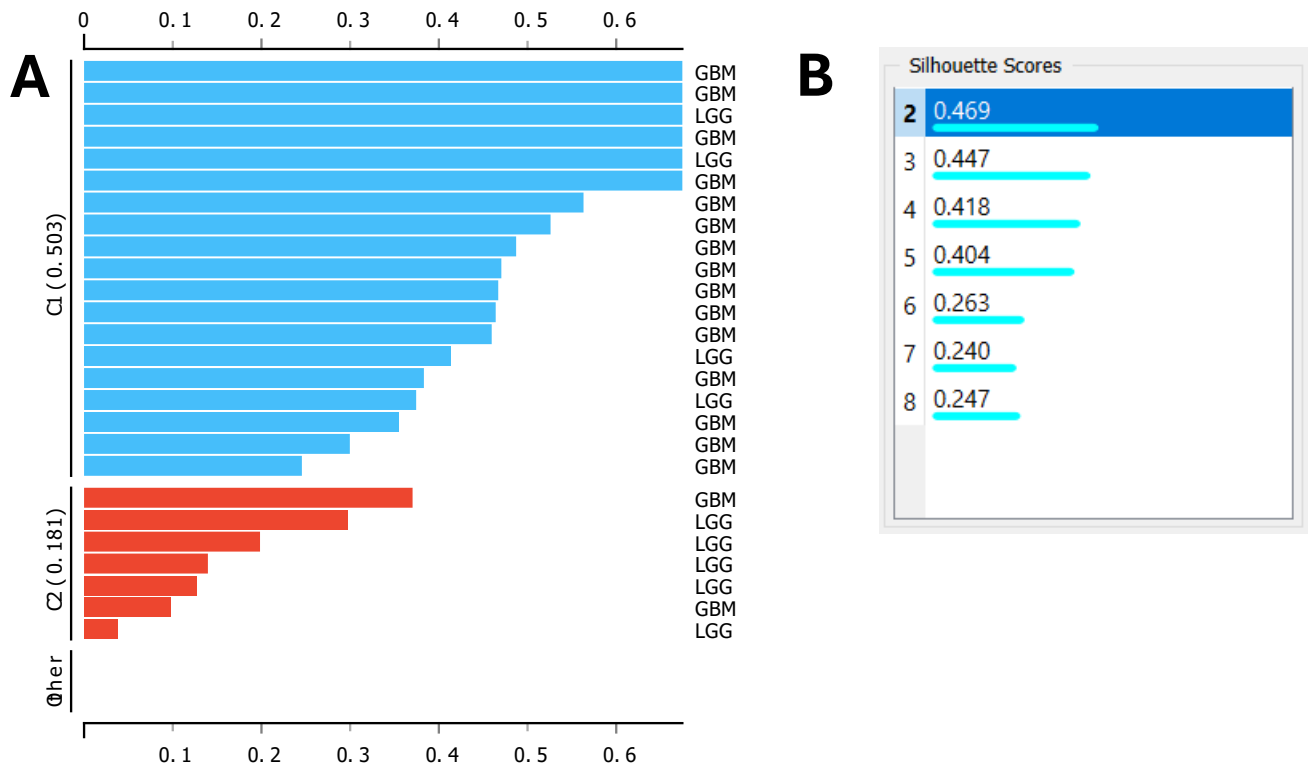

**Fig. S3.** (A) Silhouette analysis of clusters applying Euclidean metrics (used for 14 selected RRACH information). (B) k-Means clustering analysis: Silhouette score evaluation determined that the optimal number of clusters is 2, indicating a well-defined clustering structure for 2 clusters.

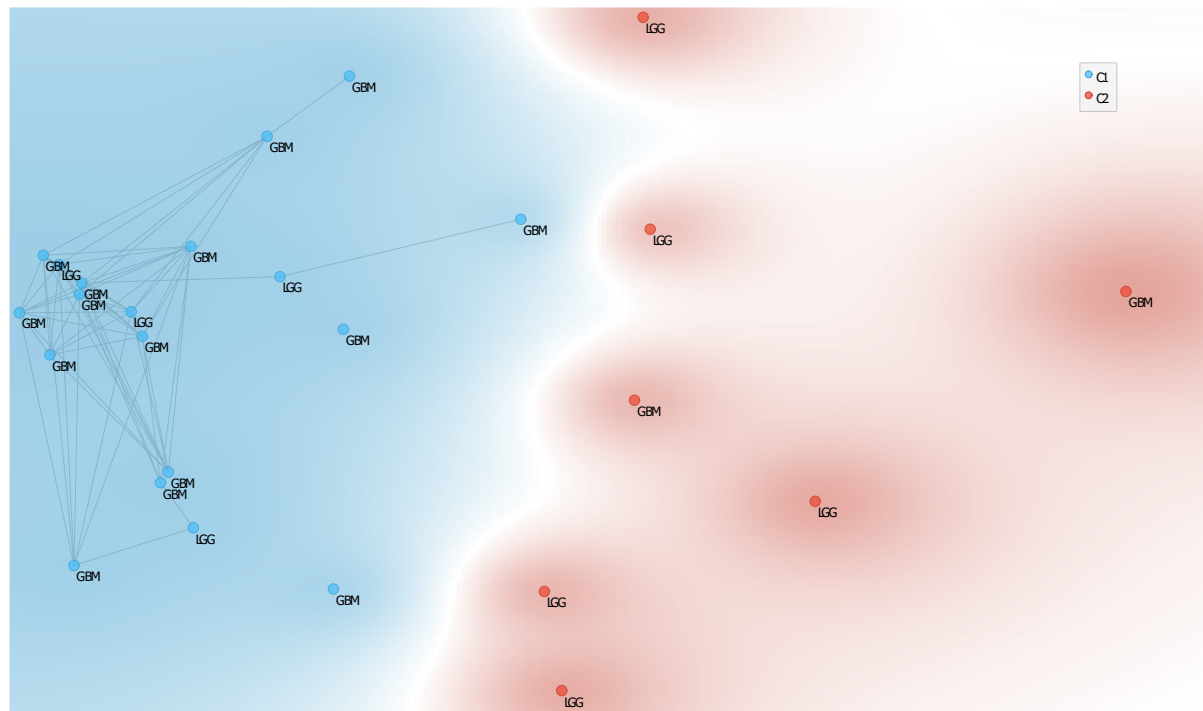

**Fig. S4.** Two clusters representing samples shown in multidimensional scaling (MDS) plot revealed closer distances between cluster 1 samples than cluster 2 samples.

Steponaitis et al. m6A-LncRNA Landscape Highlights Reduced Levels of m6A Modification in Glioblastoma as Compared to Low-Grade Glioma

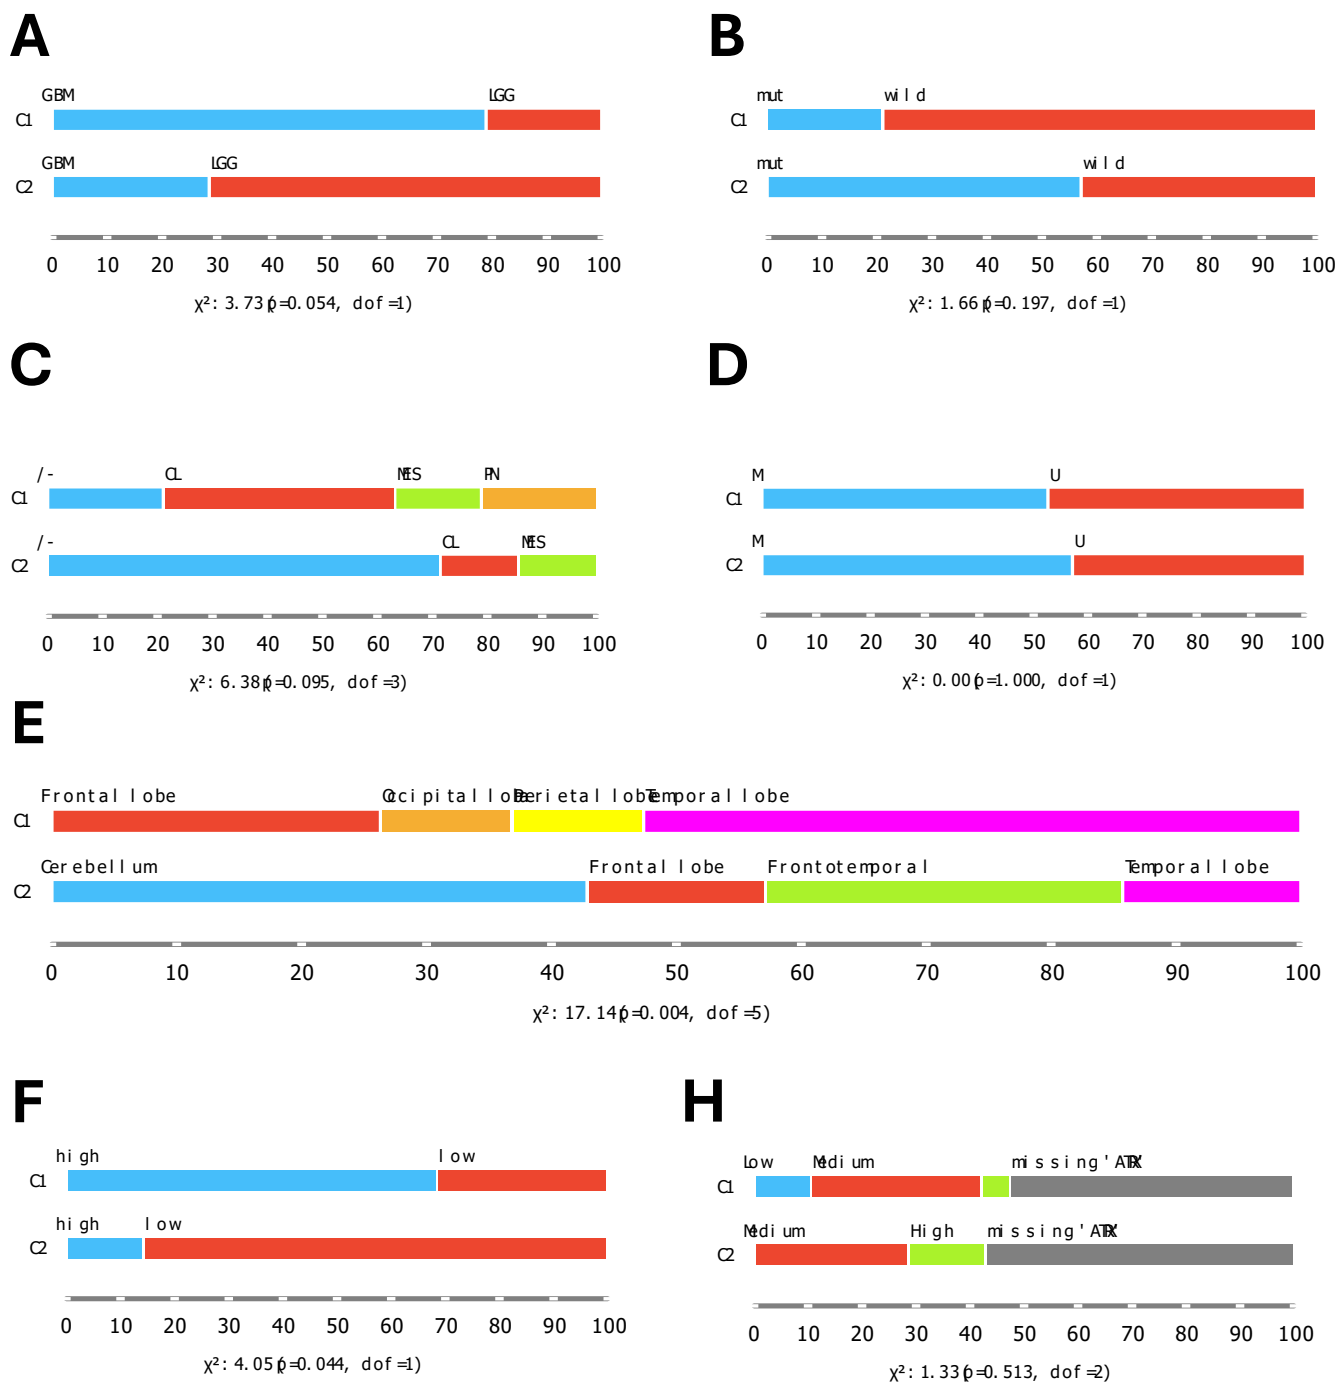

**Fig. S5.** Comparison of clinical and molecular features distribution between clusters (C1 vs C2). Statistics calculated applying chi-square analysis. **(A)** Tumor type distribution; **(B)** IDH1 mutation status distribution; **(C)** Glioblastoma molecular subtype distribution: CL –classical, MES – mesenchymal, PN – proneural, /- LGG samples, no subtype; **(D)** MGMT methylation status distribution; **(E)** Tumor location distribution; **(F)** Ki67 index (indicates aggressiveness of gliomas) distribution; **(H)** ATRX level distribution.

Steponaitis et al. m6A-LncRNA Landscape Highlights Reduced Levels of m6A Modification in Glioblastoma as Compared to Low-Grade Glioma

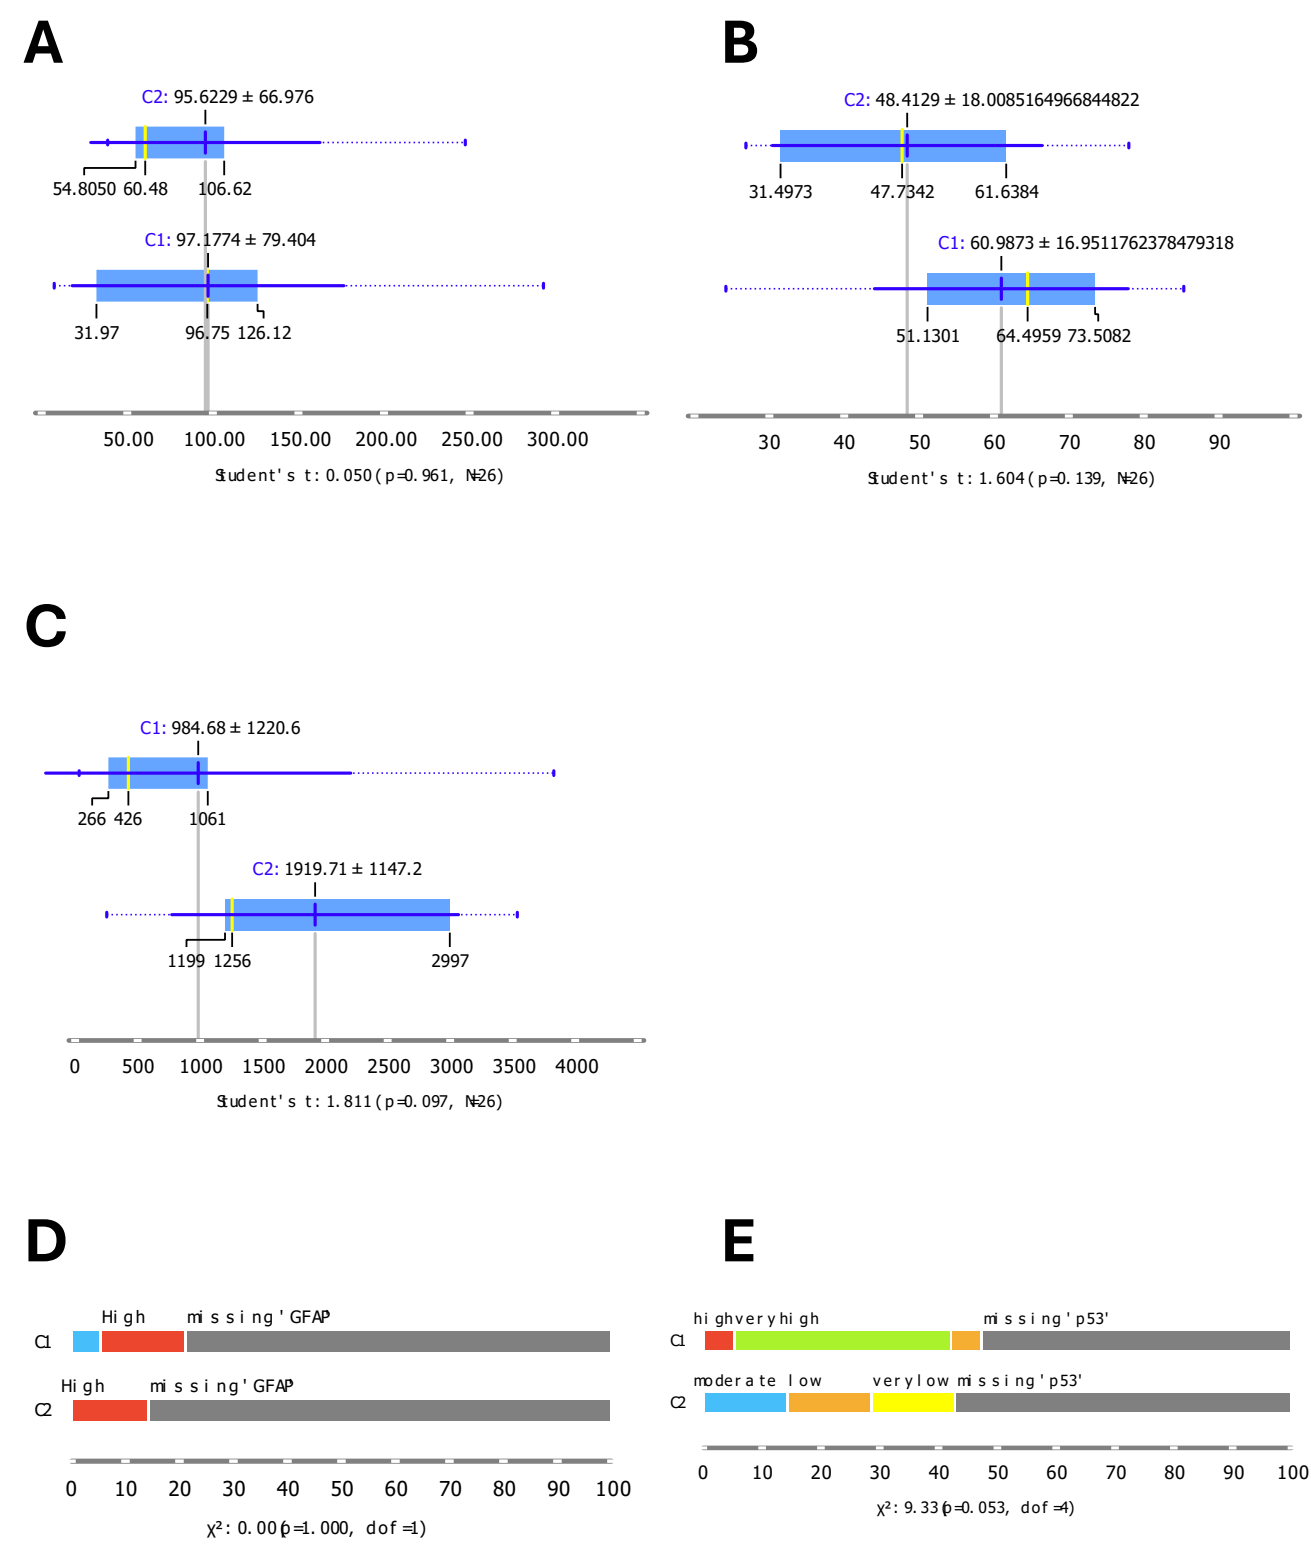

**Fig. S6.** Comparison of clinical and molecular features distribution between clusters (C1 vs C2). Statistics calculated applying Student's t-test. **(A)** Distribution of patient Age at the date of operation; **(B)** Tumor size distribution (cm3); **(C)** Patient survival distribution (days); **(D)** GFAP level distribution; **(E)** P53 level distribution.

Steponaitis et al. m6A-LncRNA Landscape Highlights Reduced Levels of m6A Modification in Glioblastoma as Compared to Low-Grade Glioma

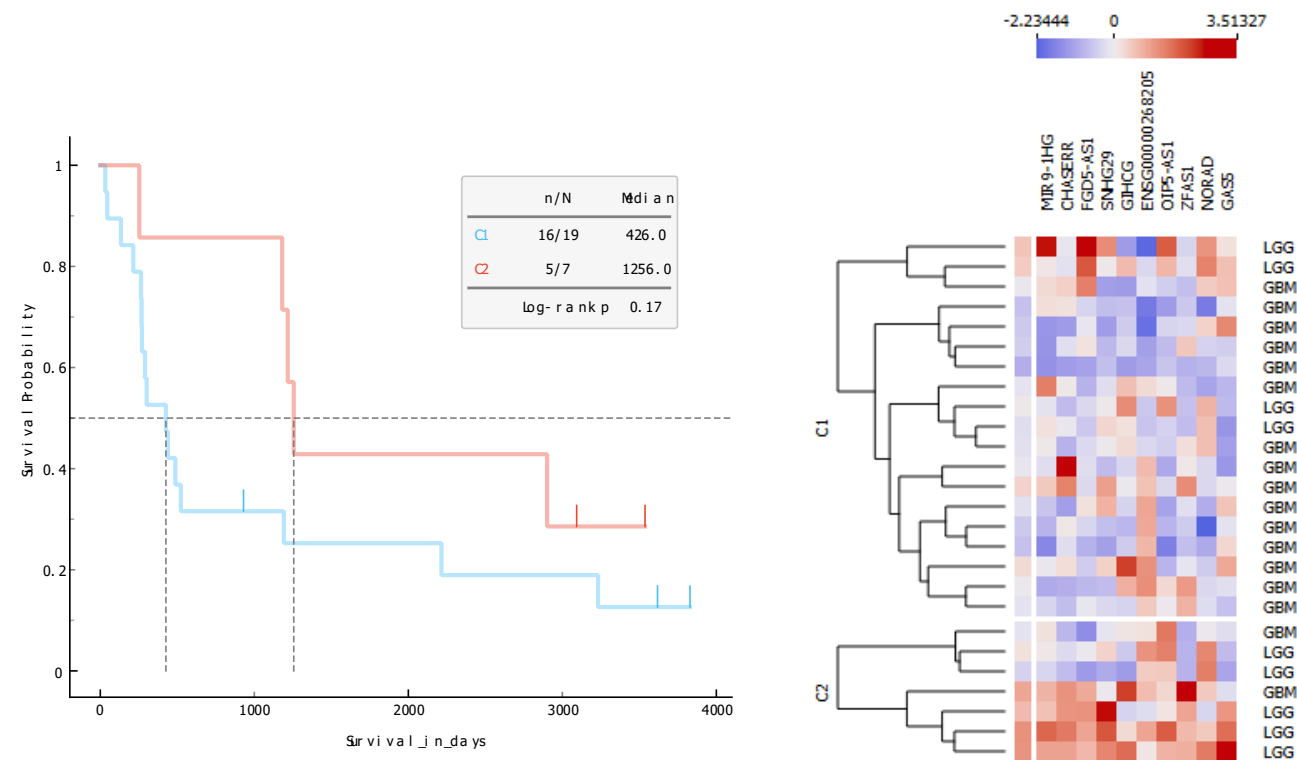

**Fig. S7.** (A) Kaplan-Meier survival curve of pateint from C1 and C2 clusters (log-rank p=0.17; df=1; X2=1.88). (B) Heat-map of selected 10 lncRNAs gene expression (selected based on m6A methylation). Values given as TPM standartized to  $\mu=0$ ,  $\sigma^2=1$ .

Steponaitis et al. m6A-LncRNA Landscape Highlights Reduced Levels of m6A Modification in Glioblastoma as Compared to Low-Grade Glioma

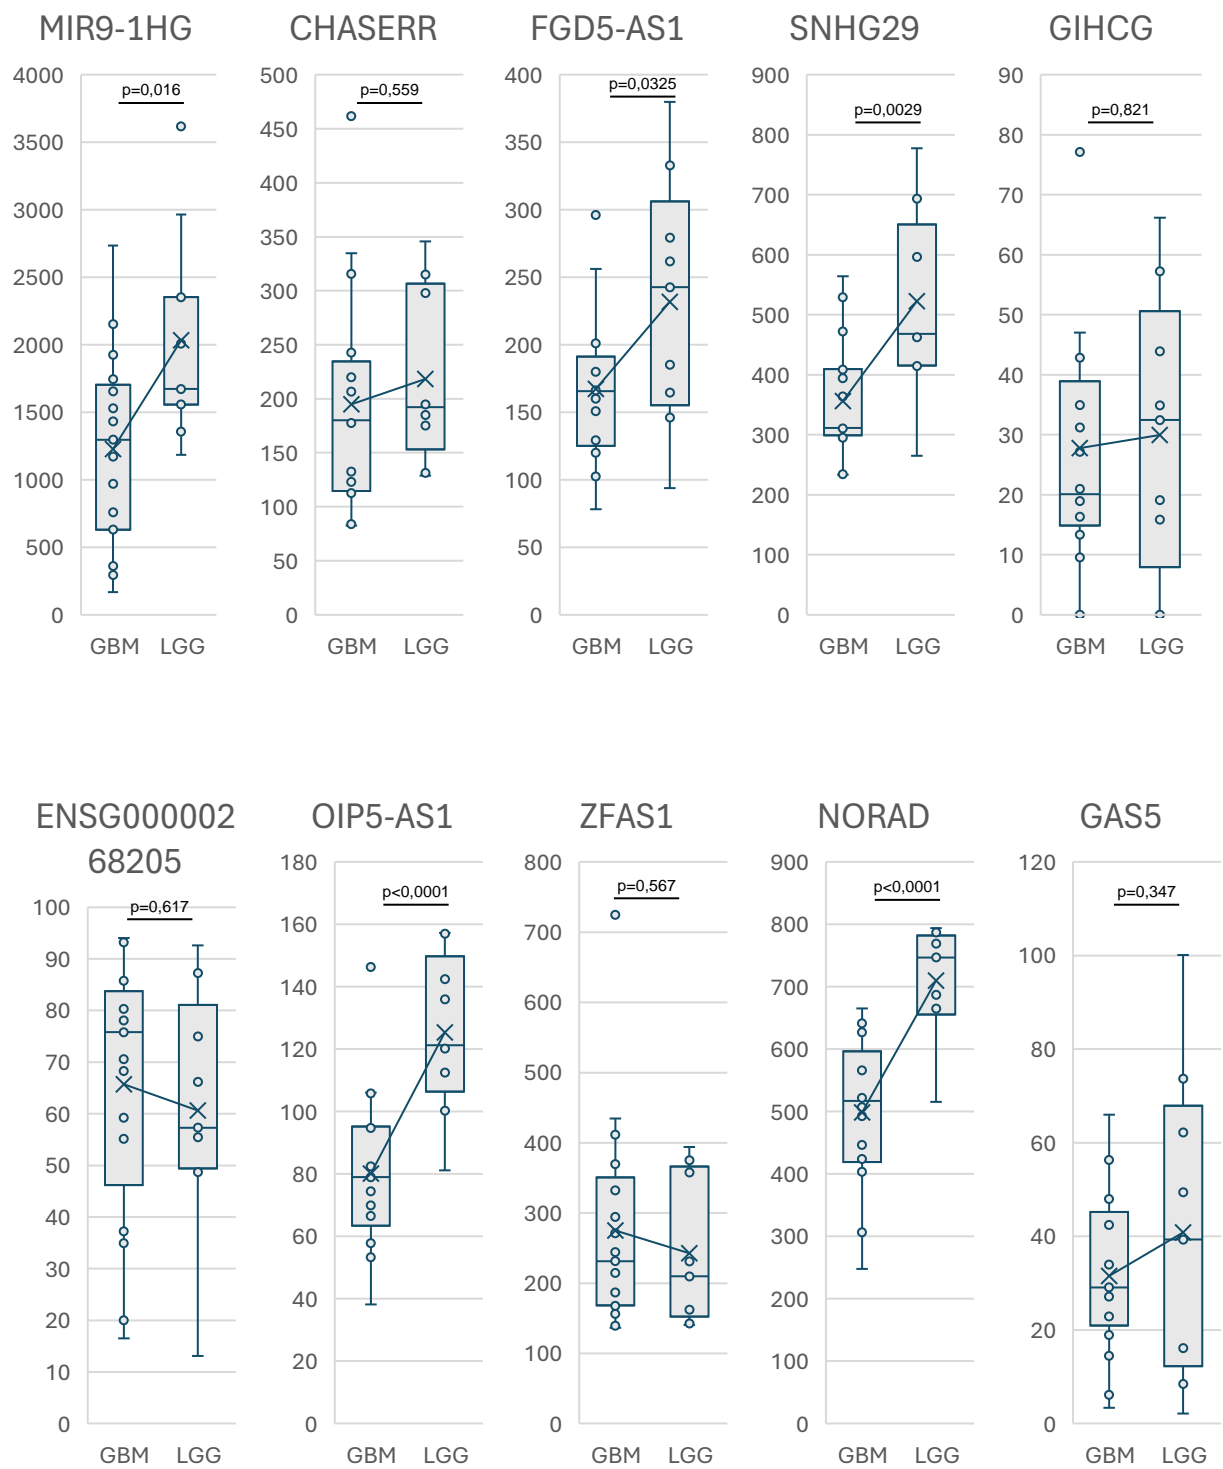

**Fig. S8.** Box-plot visualization of selected lncRNAs expression (TPM) level comparison between glioblastoma and low-grade glioma cohorts (t-test statistics).



Steponaitis et al. m6A-LncRNA Landscape Highlights Reduced Levels of m6A Modification in Glioblastoma as Compared to Low-Grade Glioma

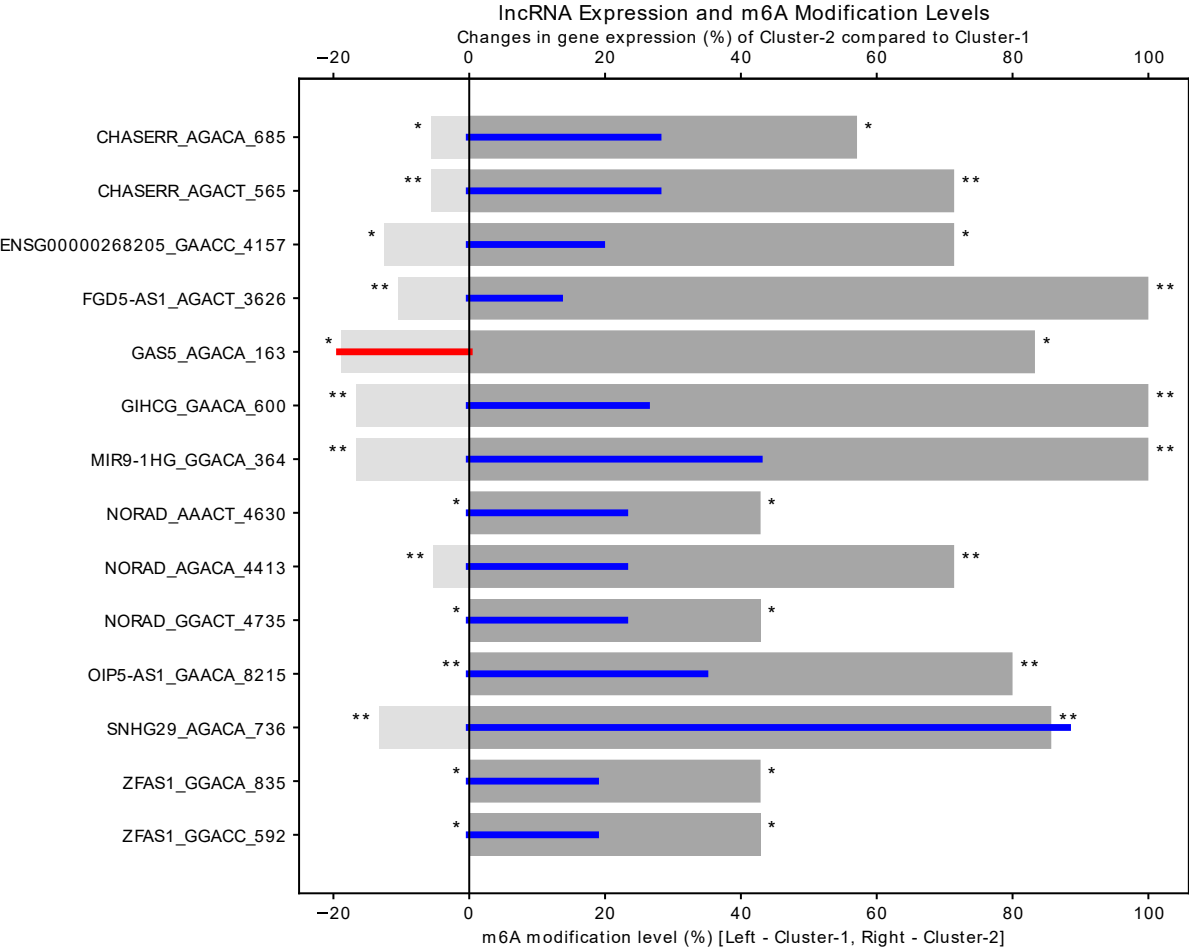

**Fig. S9.** RRACHs that were selected to be informative to distinguish between cluster m6A methylation (grey bars) and same lncRNAs expression (blue and red bars). Scale from 0 to 100 indicated increasing m6A and/or expression level in cluster 2 (C2), scale from 0 to -100 indicates increasing m6A and/or expression level in cluster 1 (C1). Asterisk indicated significant increase of methylation or expression in C1 or C2 accordingly.

Steponaitis et al. m6A-LncRNA Landscape Highlights Reduced Levels of m6A Modification in Glioblastoma as Compared to Low-Grade Glioma

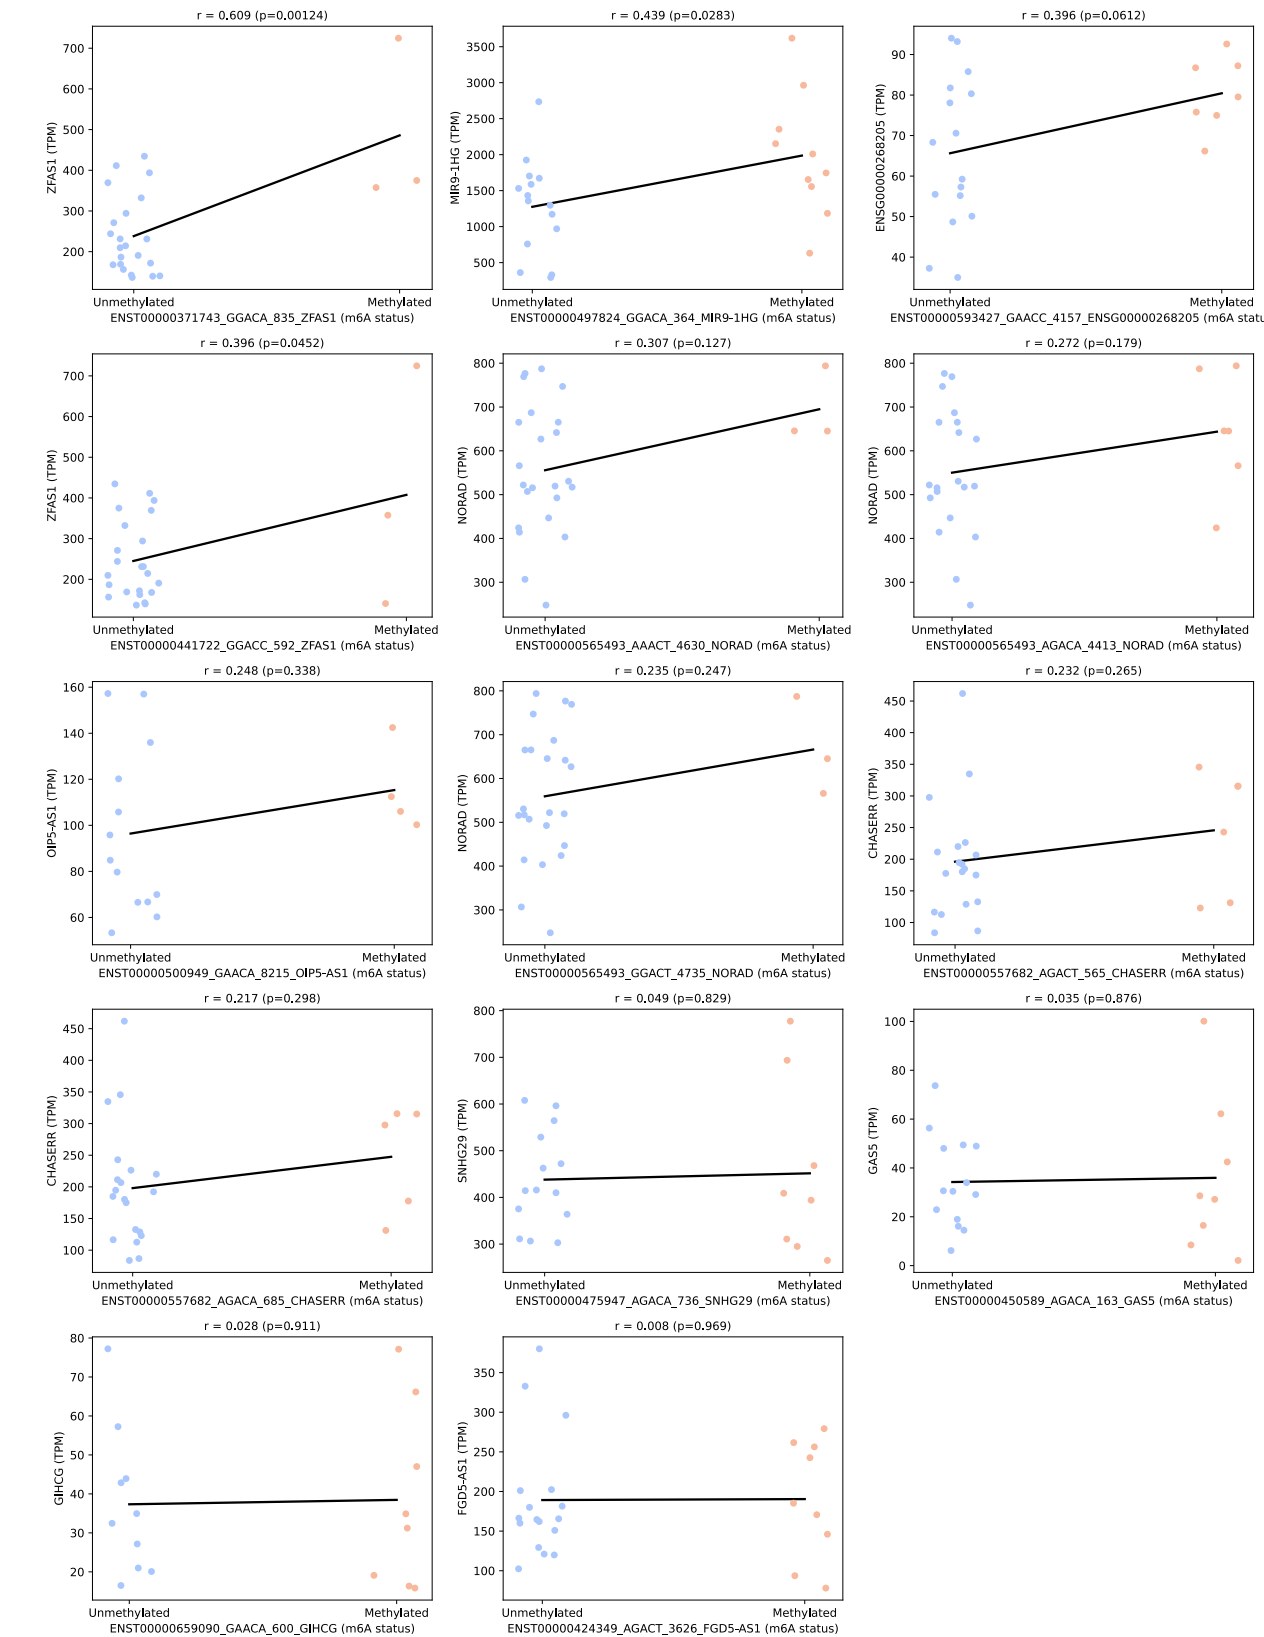

**Fig. S10.** Association between specific gene's m6A methylation site and the same gene expression. Strip plots depict the relationship between m6A methylation status (Unmethylated vs. Methylated) and gene expression (TPM values) at multiple m6A-gene combinations. Each subplot represents a different m6A location, with individual data points indicating gene expression levels across samples. Horizontal black lines connect group means to illustrate differences in expression between methylation states. The Point-Biserial Correlation coefficient (r) and p-value are displayed in each subplot, quantifying the strength and significance of the association.

**Table St3.** Pearsons correlation between m6A modulators and m6A modifications among different species of RNAs.

| Correlation | FDR     | Feature 1 | Feature 2                    |
|-------------|---------|-----------|------------------------------|
| -0.338      | 0.61292 | ALKBH5    | M6A Methylation%_pseudogenes |
| -0.292      | 0.62845 | ALKBH5    | M6A Methylation%_mRNAs       |
| -0.221      | 0.69337 | ALKBH5    | M6A Methylation%_lncRNAs     |
| -0.086      | 0.87324 | ALKBH5    | M6A Methylation%_other       |
| 0.226       | 0.69337 | FTO       | M6A Methylation%_lncRNAs     |
| 0.304       | 0.62845 | FTO       | M6A Methylation%_pseudogenes |
| 0.313       | 0.62845 | FTO       | M6A Methylation%_mRNAs       |
| 0.368       | 0.5436  | FTO       | M6A Methylation%_other       |
| 0.074       | 0.87324 | METTL14   | M6A Methylation%_pseudogenes |
| 0.083       | 0.87324 | METTL14   | M6A Methylation%_other       |
| 0.173       | 0.75096 | METTL14   | M6A Methylation%_mRNAs       |
| 0.18        | 0.7482  | METTL14   | M6A Methylation%_lncRNAs     |
| -0.232      | 0.69337 | METTL16   | M6A Methylation%_other       |
| 0.038       | 0.92425 | METTL16   | M6A Methylation%_mRNAs       |
| 0.059       | 0.88726 | METTL16   | M6A Methylation%_pseudogenes |
| 0.076       | 0.87324 | METTL16   | M6A Methylation%_lncRNAs     |
| -0.253      | 0.69337 | METTL3    | M6A Methylation%_pseudogenes |
| -0.145      | 0.82967 | METTL3    | M6A Methylation%_mRNAs       |
| -0.117      | 0.87324 | METTL3    | M6A Methylation%_lncRNAs     |
| 0.049       | 0.90214 | METTL3    | M6A Methylation%_other       |
| 0.044       | 0.91385 | METTL5    | M6A Methylation%_other       |
| 0.069       | 0.87324 | METTL5    | M6A Methylation%_lncRNAs     |
| 0.092       | 0.87324 | METTL5    | M6A Methylation%_mRNAs       |
| 0.27        | 0.66566 | METTL5    | M6A Methylation%_pseudogenes |
| 0.09        | 0.87324 | VIRMA     | M6A Methylation%_other       |
| 0.177       | 0.7482  | VIRMA     | M6A Methylation%_mRNAs       |
| 0.248       | 0.69337 | VIRMA     | M6A Methylation%_lncRNAs     |
| 0.289       | 0.62845 | VIRMA     | M6A Methylation%_pseudogenes |
| -0.275      | 0.66152 | WTAP      | M6A Methylation%_pseudogenes |
| -0.223      | 0.69337 | WTAP      | M6A Methylation%_lncRNAs     |
| -0.089      | 0.87324 | WTAP      | M6A Methylation%_mRNAs       |
| -0.003      | 0.9924  | WTAP      | M6A Methylation%_other       |
| -0.07       | 0.87324 | ZCCHC4    | M6A Methylation%_other       |
| 0.453       | 0.30643 | ZCCHC4    | M6A Methylation%_lncRNAs     |
| 0.464       | 0.30643 | ZCCHC4    | M6A Methylation%_mRNAs       |
| 0.58        | 0.08466 | ZCCHC4    | M6A Methylation%_pseudogenes |

**M6A Methylation%** indicates the percentage of methylated RRACH motifs out of the total identified RRACH motifs

**M6A Methylation%\_other** encompass miscRNA, mtRNA, scRNA, snRNA, IG\_C\_genes RNA, etc. This group represents very small part of all the identified RRACHs (from 0.002% to 0.14%).

Steponaitis et al. m6A-LncRNA Landscape Highlights Reduced Levels of m6A Modification in Glioblastoma as Compared to Low-Grade Glioma

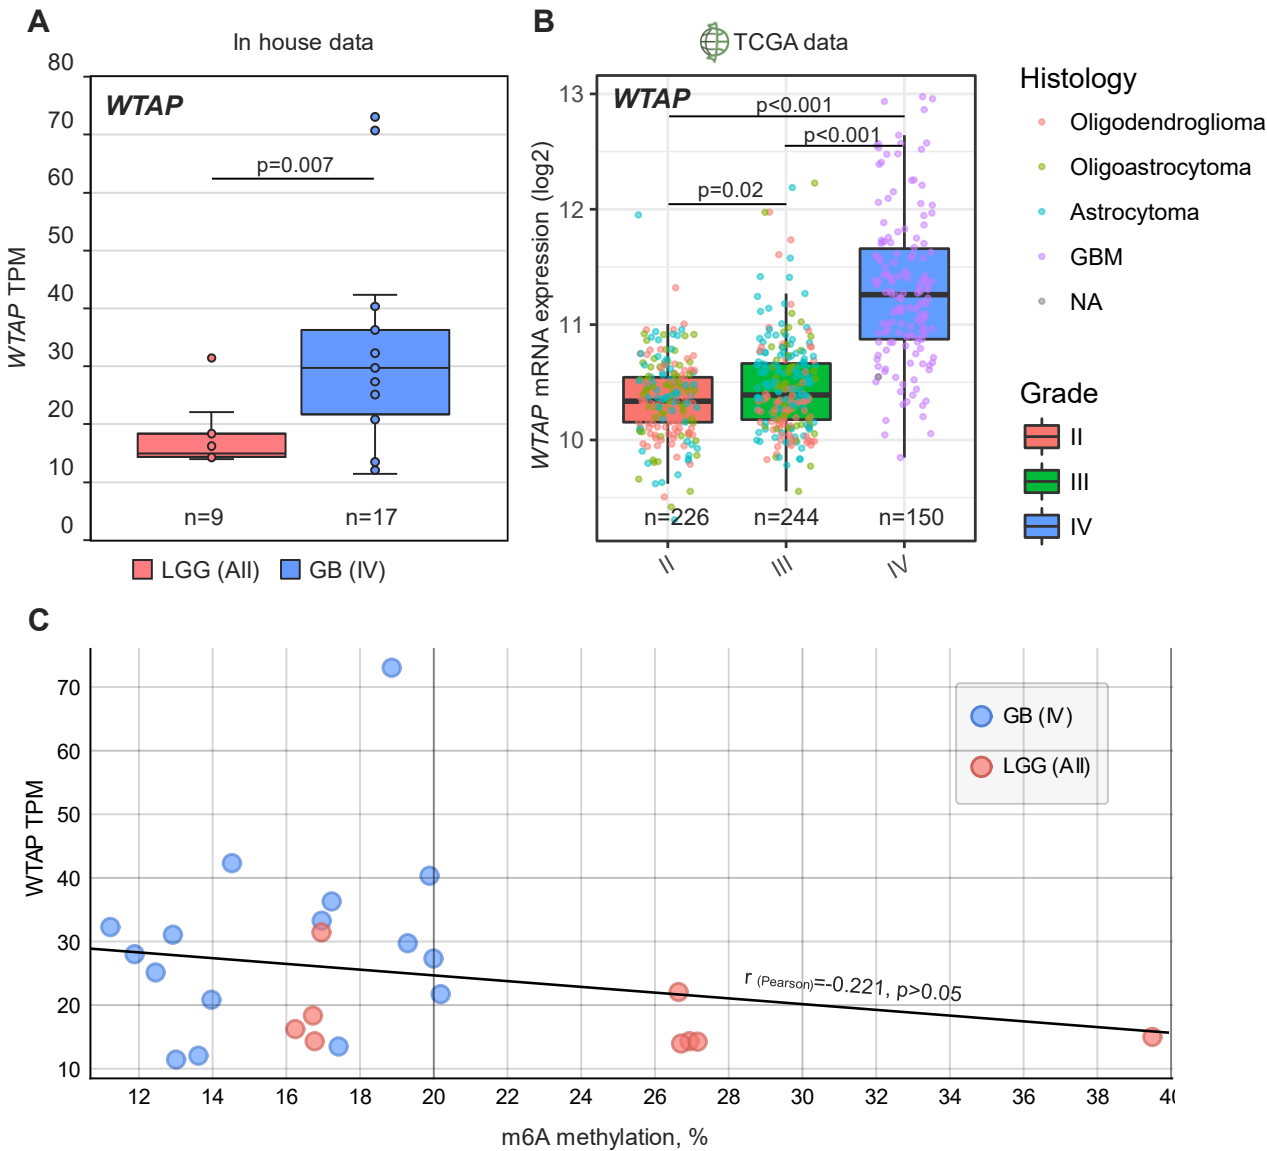

**Fig. S11.** Comparison of m6A writer WTAP mRNA levels between grade II glioma (red) and GBM (blue) in our in-house cohort (**A**) and in the TCGA cohort (**B**). Both datasets show increased WTAP expression in GBM. (**C**) Correlation between global (polyadenylated RNAs) RNAs m6A methylation and WTAP mRNA expression in human brain gliomas.

Steponaitis et al. m6A-LncRNA Landscape Highlights Reduced Levels of m6A Modification in Glioblastoma as Compared to Low-Grade Glioma

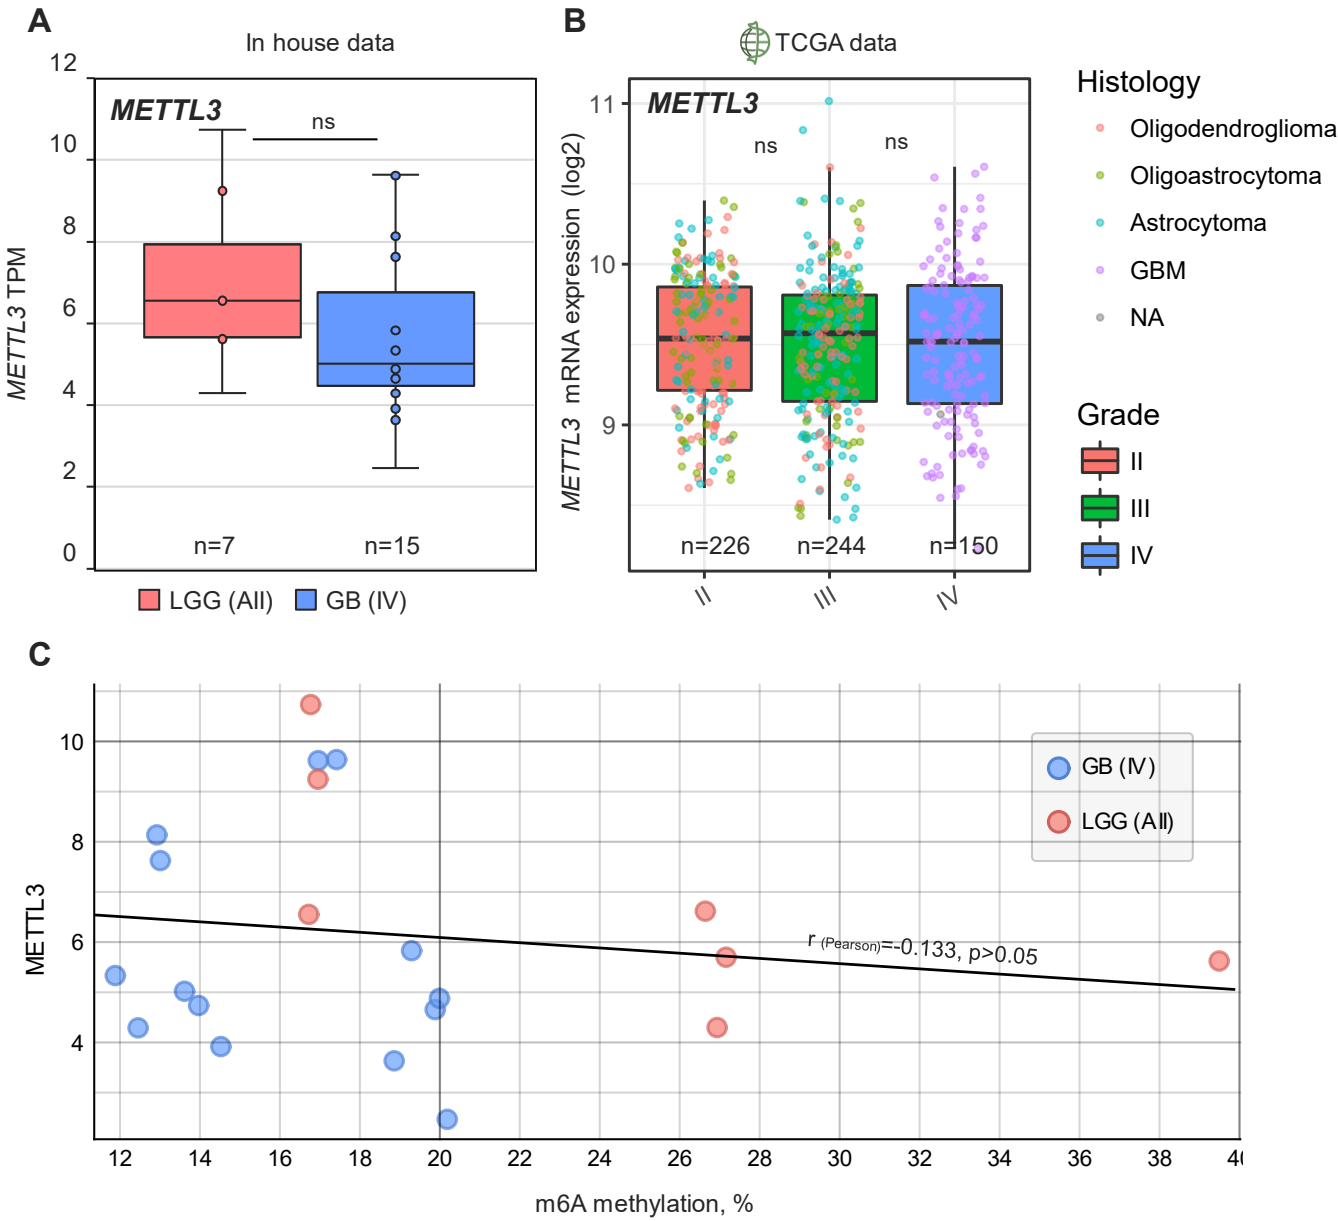

**Fig. S12.** Comparison of m6A writer METTL3 mRNA levels between grade II glioma (red) and GBM (blue) in our in-house cohort (A) and in the TCGA cohort (B). Both datasets show uniform METTL3 expressions between glioma malignancies. (C) Correlation between global (polyadenylated RNAs) RNAs m6A methylation and METTL3 mRNA expression in human brain gliomas.

Steponaitis et al. m6A-LncRNA Landscape Highlights Reduced Levels of m6A Modification in Glioblastoma as Compared to Low-Grade Glioma

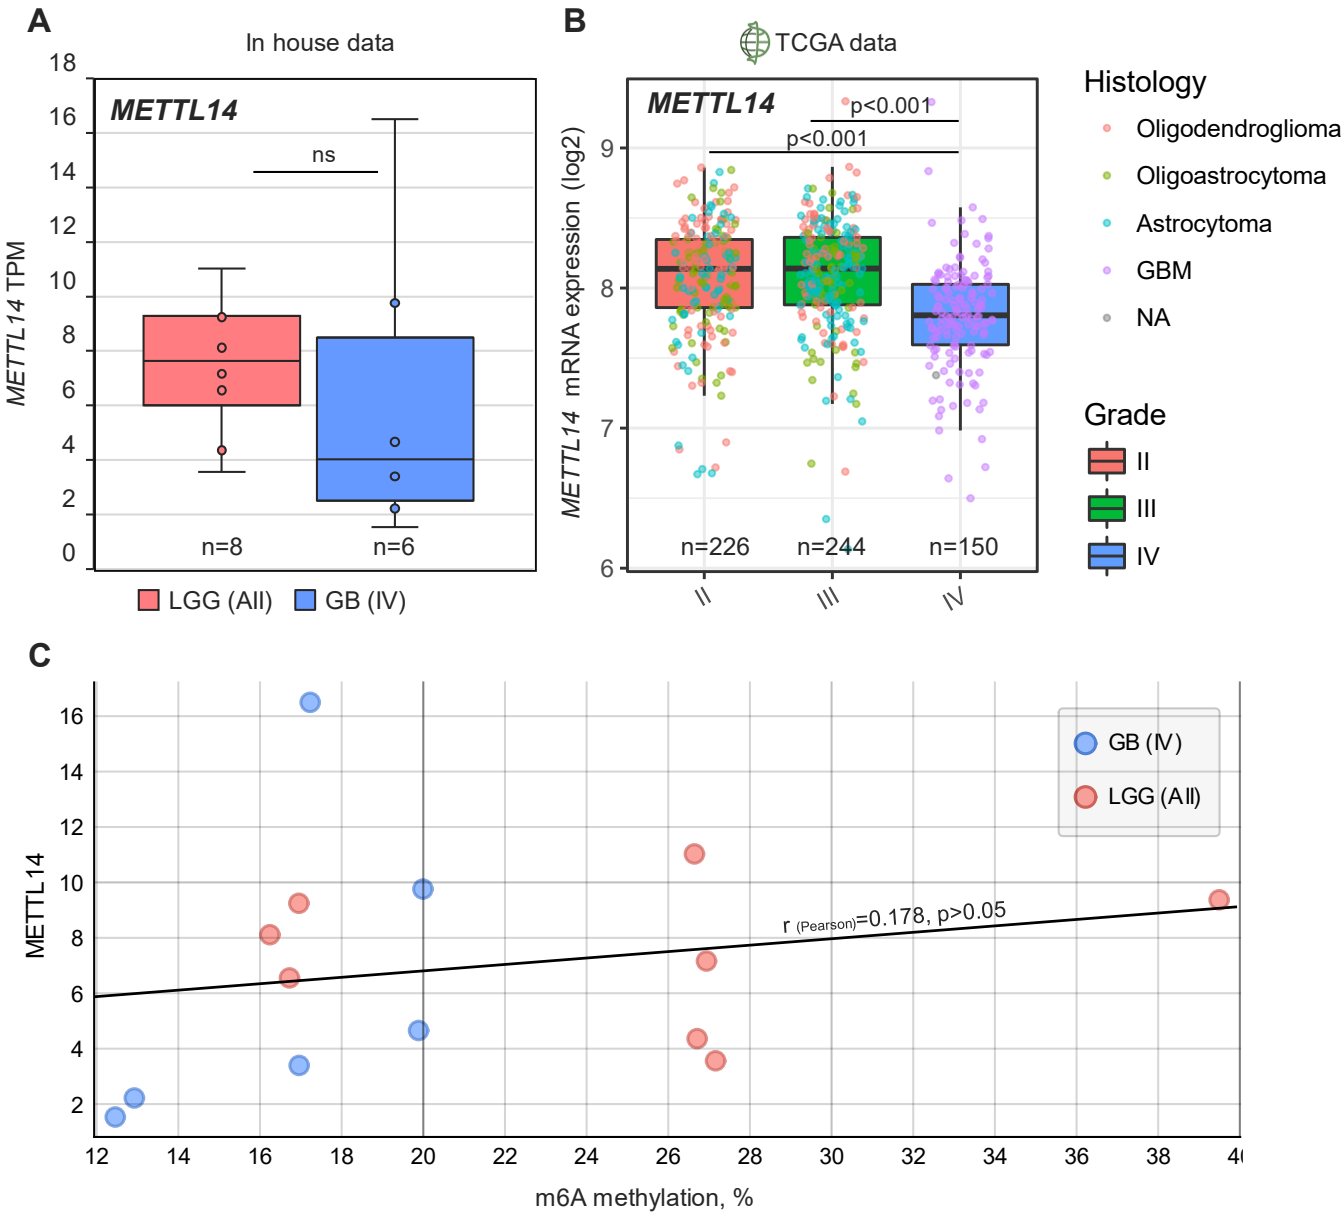

**Fig. S13.** Comparison of m6A writer METTL14 mRNA levels between grade II glioma (red) and GBM (blue) in our in-house cohort (A) and in the TCGA cohort (B). The TCGA dataset shows decreased METTL14 expression in GBM, while our in-house dataset lacks the data to confirm the same results. However, the trend remains consistent. (C) Correlation between global (polyadenylated RNAs) RNAs m6A methylation and METTL14 mRNA expression in human brain gliomas.

**Fig. S14.** Comparison of m6A eraser ALKBH5 mRNA levels between grade II glioma (red) and GBM (blue) in our in-house cohort (**A**) and in the TCGA cohort (**B**). The TCGA dataset shows slightly increased ALKBH5 expression in GBM, while our in-house dataset shows uniform expression between malignancies. However, the trend remains consistent. (**C**) Correlation between global (polyadenylated RNAs) RNAs m6A methylation and ALKBH5 mRNA expression in human brain gliomas.

Steponaitis et al. m6A-LncRNA Landscape Highlights Reduced Levels of m6A Modification in Glioblastoma as Compared to Low-Grade Glioma

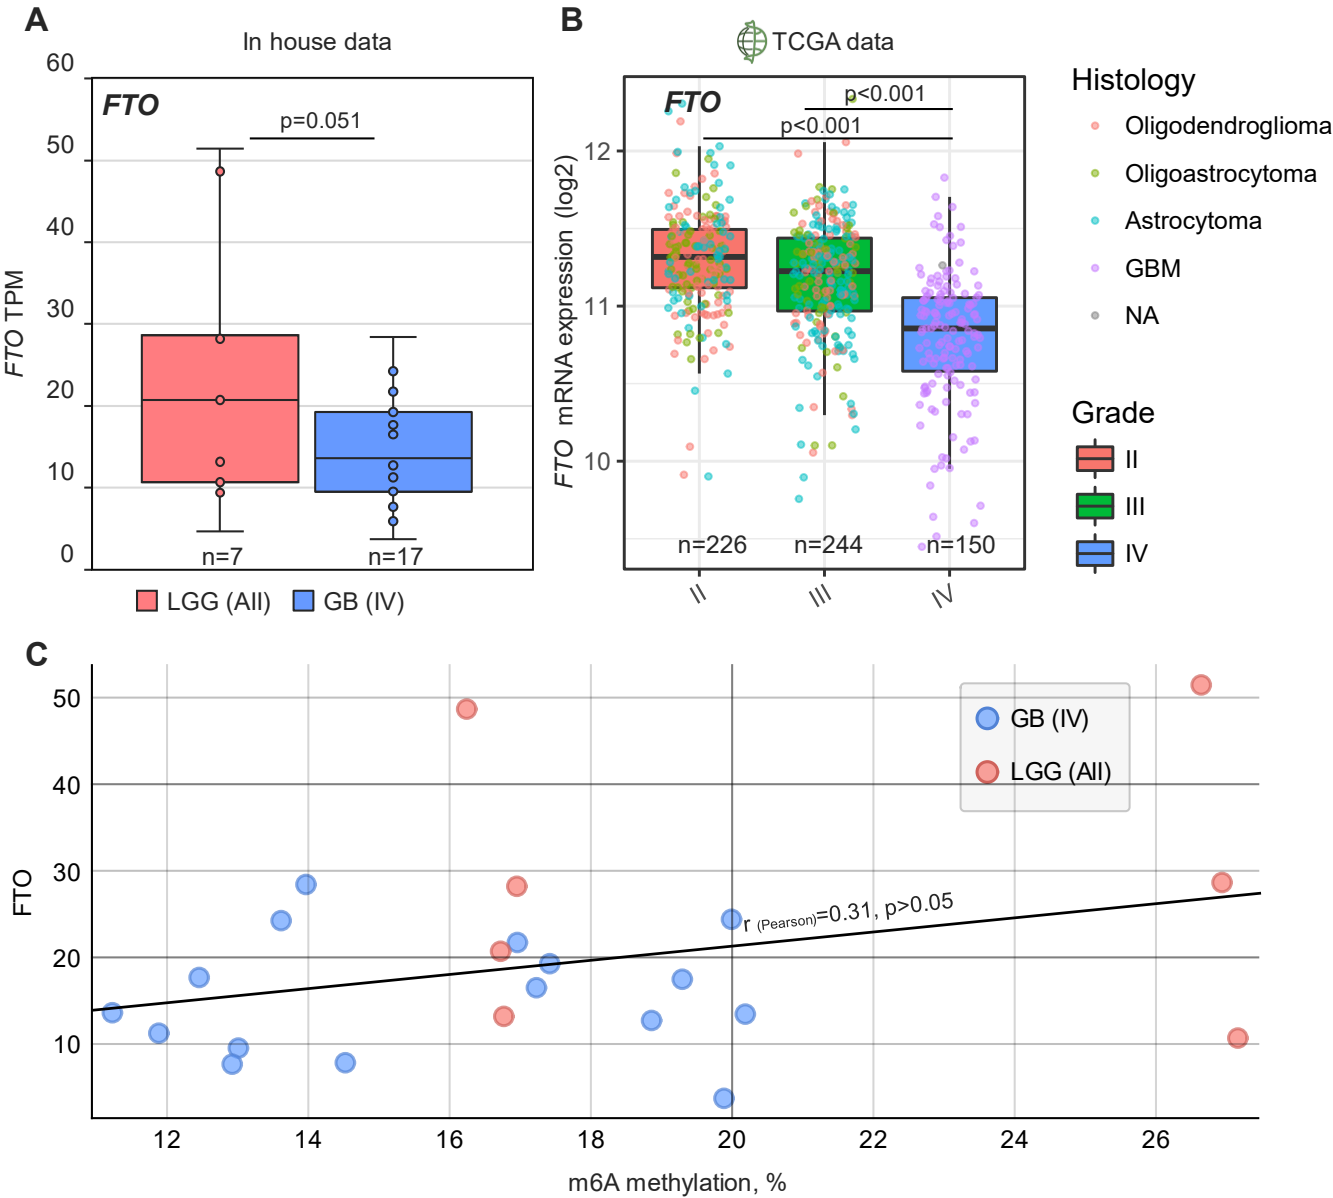

**Fig. S15.** Comparison of m6A eraser FTO mRNA levels between grade II glioma (red) and GBM (blue) in our in-house cohort (A) and in the TCGA cohort (B). Both dataset shows decreased FTO expression in GBMs as compared to grade II gliomas. (C) Correlation between global (polyadenylated RNAs) RNAs m6A methylation and FTO mRNA expression in human brain gliomas.



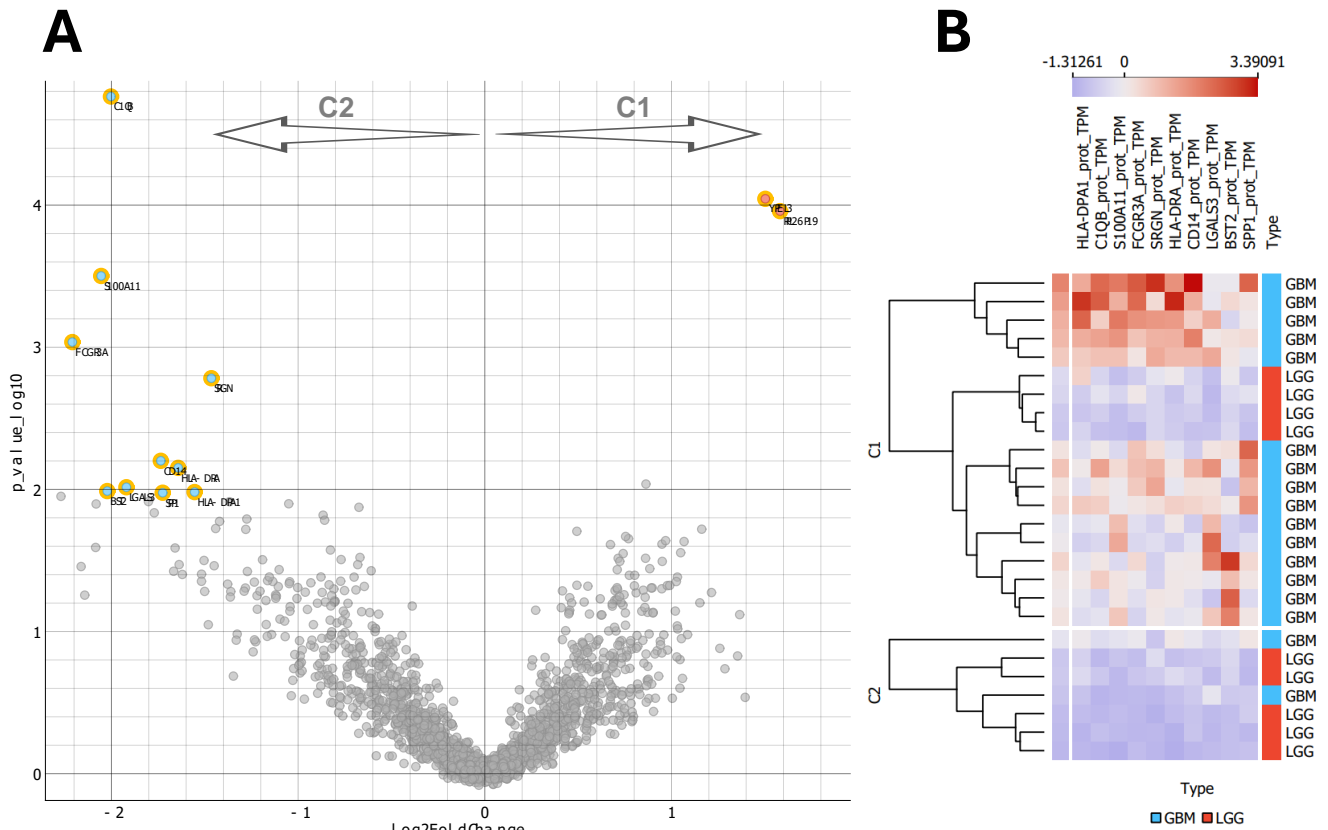

**Fig. S16.** (A) Deseq2 of mRNA between cluster C1 and C2. (B) Heat-map of 10 C1 cluster associated mRNA genes. Values given as TPM standartized to  $\mu=0$ ,  $\sigma^2=1$ .

**Table St4.** GO analysis of 10 genes upregulated in C1 cluster samples. Output of: biological processe.

| Organism: Human |                                                | Annotation provider: GOA |                     |                  |                                                                            |
|-----------------|------------------------------------------------|--------------------------|---------------------|------------------|----------------------------------------------------------------------------|
| GOID            | Term                                           | P-value                  | Uncorrected P-value | Number annotated | Annotated genes                                                            |
| GO:0002682      | regulation of immune system process            | 4.93117e-06              | 2.03767e-08         | 6                | 7BST2, C1QB, CD14, FCGR3A, HLA-DPA1, HLA-DRA, LGALS3                       |
| GO:0051239      | regulation of multicellular organismal process | 8.63673e-06              | 3.5689e-08          | 8                | 8BST2, CD14, FCGR3A, HLA-DPA1, HLA-DRA, LGALS3, SPP1, SRGN                 |
| GO:0045087      | innate immune response                         | 1.02385e-05              | 4.23078e-08         | 6                | 6BST2, C1QB, CD14, FCGR3A, HLA-DPA1, LGALS3                                |
| GO:0050776      | regulation of immune response                  | 1.39533e-05              | 5.76581e-08         | 6                | 6C1QB, CD14, FCGR3A, HLA-DPA1, HLA-DRA, LGALS3                             |
| GO:0140546      | defense response to symbiont                   | 1.82706e-05              | 7.54984e-08         | 6                | 6BST2, C1QB, CD14, FCGR3A, HLA-DPA1, LGALS3                                |
| GO:0002684      | positive regulation of immune system process   | 2.61718e-05              | 1.08148e-07         | 6                | 6C1QB, CD14, FCGR3A, HLA-DPA1, HLA-DRA, LGALS3                             |
| GO:0006955      | immune response                                | 3.15595e-05              | 1.30411e-07         | 7                | 7BST2, C1QB, CD14, FCGR3A, HLA-DPA1, HLA-DRA, LGALS3                       |
| GO:0098542      | defense response to other organism             | 4.28081e-05              | 1.76893e-07         | 6                | 6BST2, C1QB, CD14, FCGR3A, HLA-DPA1, LGALS3                                |
| GO:0009605      | response to external stimulus                  | 6.6656e-05               | 2.75438e-07         | 7                | 7BST2, C1QB, CD14, FCGR3A, HLA-DPA1, LGALS3, SPP1                          |
| GO:0070663      | regulation of leukocyte proliferation          | 8.20806e-05              | 3.39176e-07         | 4                | 4BST2, FCGR3A, HLA-DPA1, LGALS3                                            |
| GO:0050896      | response to stimulus                           | 8.8679e-05               | 3.66442e-07         | 10               | 10BST2, C1QB, CD14, FCGR3A, HLA-DPA1, HLA-DRA, LGALS3, S100A11, SPP1, SRGN |

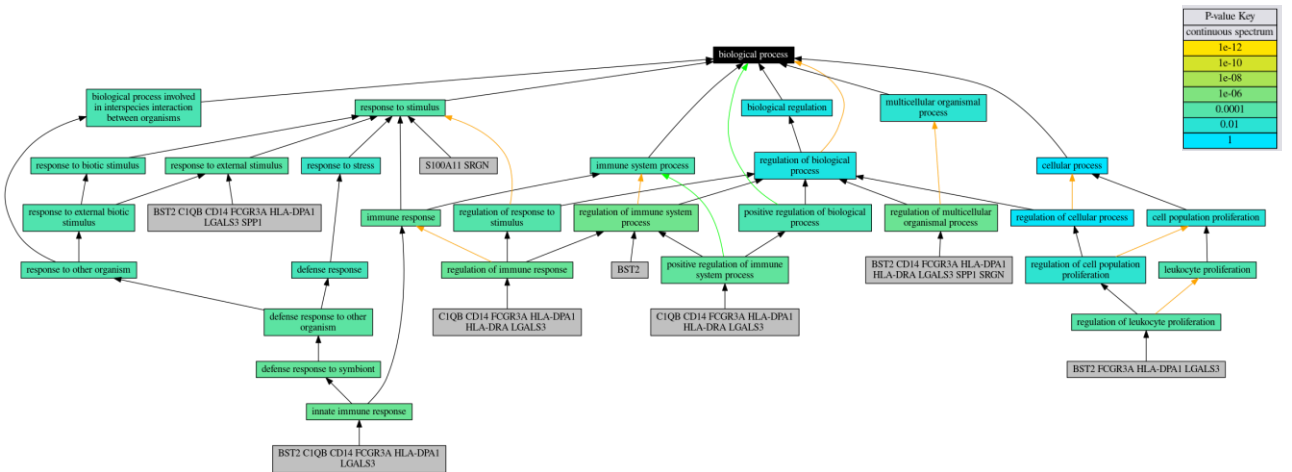

**Fig. S17.** GO analysis for biological processes output map (10 genes upregulated in C1 cluster samples).

Steponaitis et al. m6A-LncRNA Landscape Highlights Reduced Levels of m6A Modification in Glioblastoma as Compared to Low-Grade Glioma

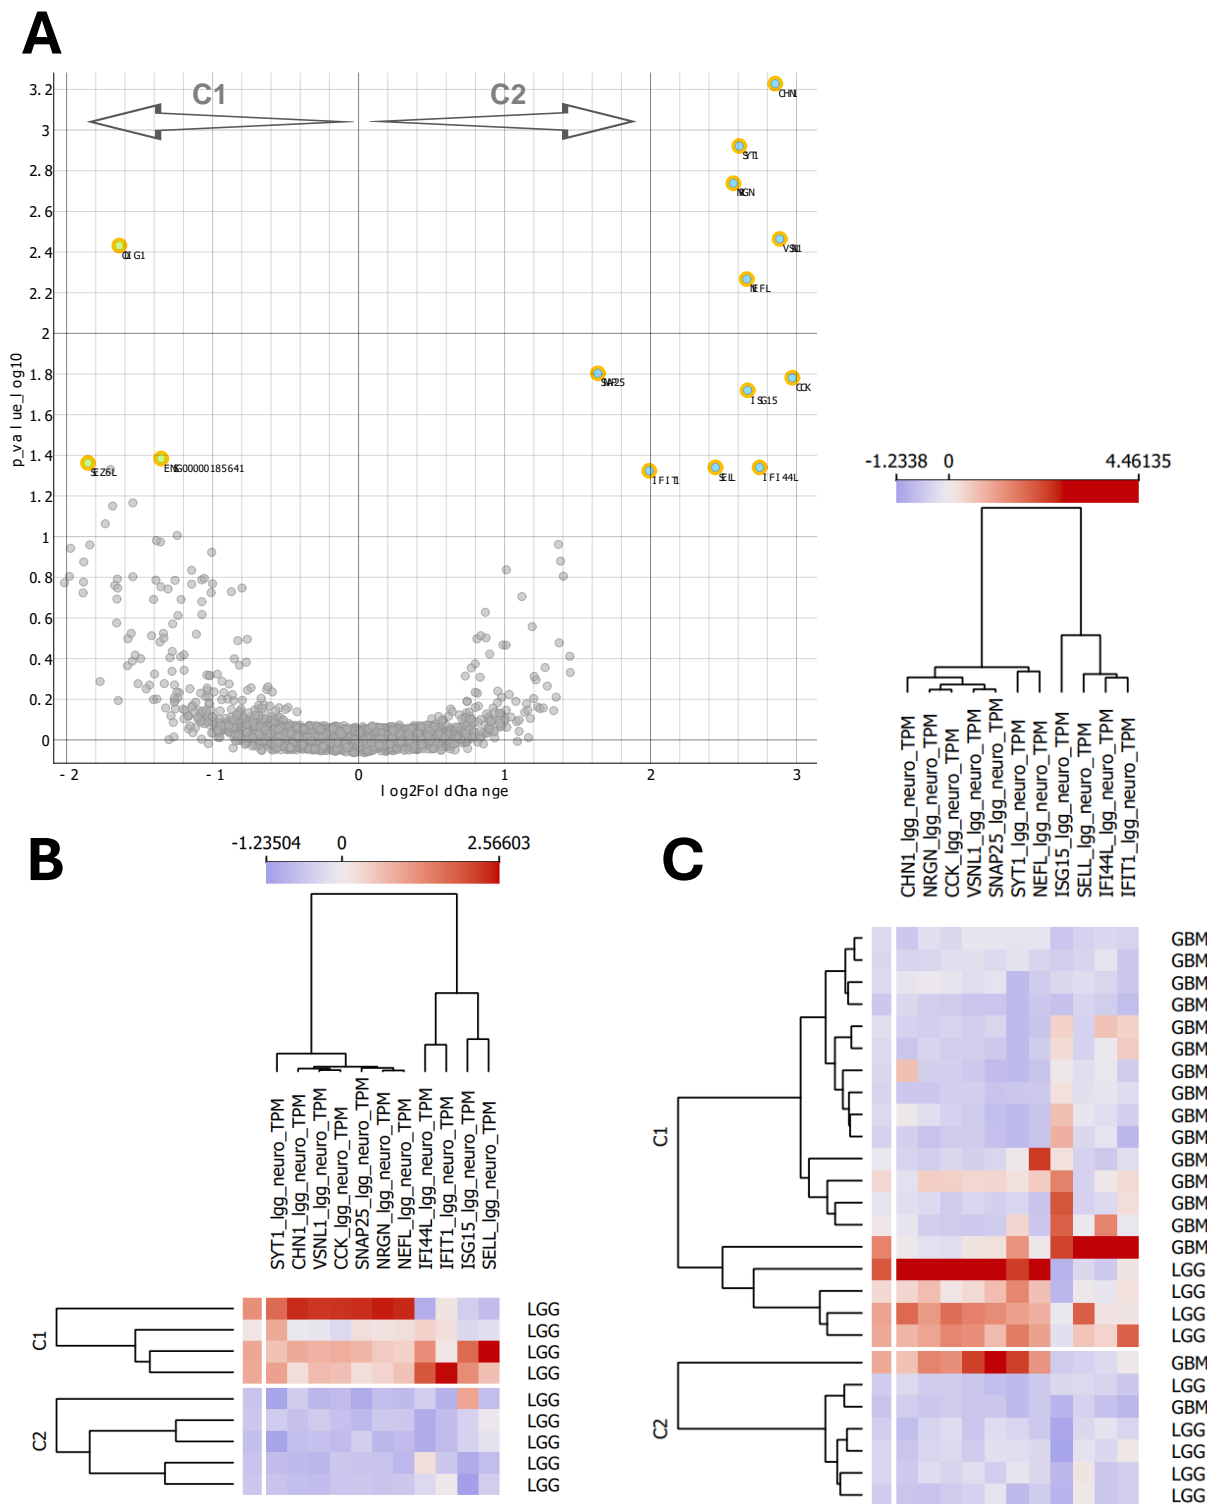

**Fig. S18.** (A) Deseq2 of mRNA between LGGs at cluster C1 and C2. (B) Heat-map of 11 C1 cluster associated mRNA genes in LGGs only, (C) in whole cohort analyzed. Values given as TPM standartized to  $\mu=0$ ,  $\sigma^2=1$ .

**Table S15.** GO analysis of 11 genes upregulated in LGGs C1 cluster. Output of: biological processes

| Organism: Human |                                                       | Annotation provider: GOA |                     |                  |                                                                |
|-----------------|-------------------------------------------------------|--------------------------|---------------------|------------------|----------------------------------------------------------------|
| GOID            | Term                                                  | P-value                  | Uncorrected P-value | Number annotated | Annotated genes                                                |
| GO:0048812      | neuron projection morphogenesis                       | 6.39615e-05              | 3.15081e-07         | 5                | CCK, CHN1, NEFL, SNAP25, SYT1                                  |
| GO:0120039      | plasma membrane bounded cell projection morphogenesis | 7.18925e-05              | 3.5415e-07          | 5                | CCK, CHN1, NEFL, SNAP25, SYT1                                  |
| GO:0048858      | cell projection morphogenesis                         | 7.45247e-05              | 3.67117e-07         | 5                | CCK, CHN1, NEFL, SNAP25, SYT1                                  |
| GO:0000902      | cell morphogenesis                                    | 0.000503039              | 2.47802e-06         | 5                | CCK, CHN1, NEFL, SNAP25, SYT1                                  |
| GO:0031175      | neuron projection development                         | 0.000580006              | 2.85717e-06         | 5                | CCK, CHN1, NEFL, SNAP25, SYT1                                  |
| GO:0050896      | response to stimulus                                  | 0.00064933               | 3.19867e-06         | 10               | CCK, CHN1, IFI44L, IFIT1, ISG15, NEFL, NRG1, SELL, SYT1, VSNL1 |
| GO:0007409      | axonogenesis                                          | 0.000694631              | 3.42183e-06         | 4                | CCK, CHN1, NEFL, SNAP25                                        |
| GO:0048791      | calcium ion-regulated exocytosis of neurotransmitter  | 0.000736786              | 3.62949e-06         | 2                | SNAP25, SYT1                                                   |

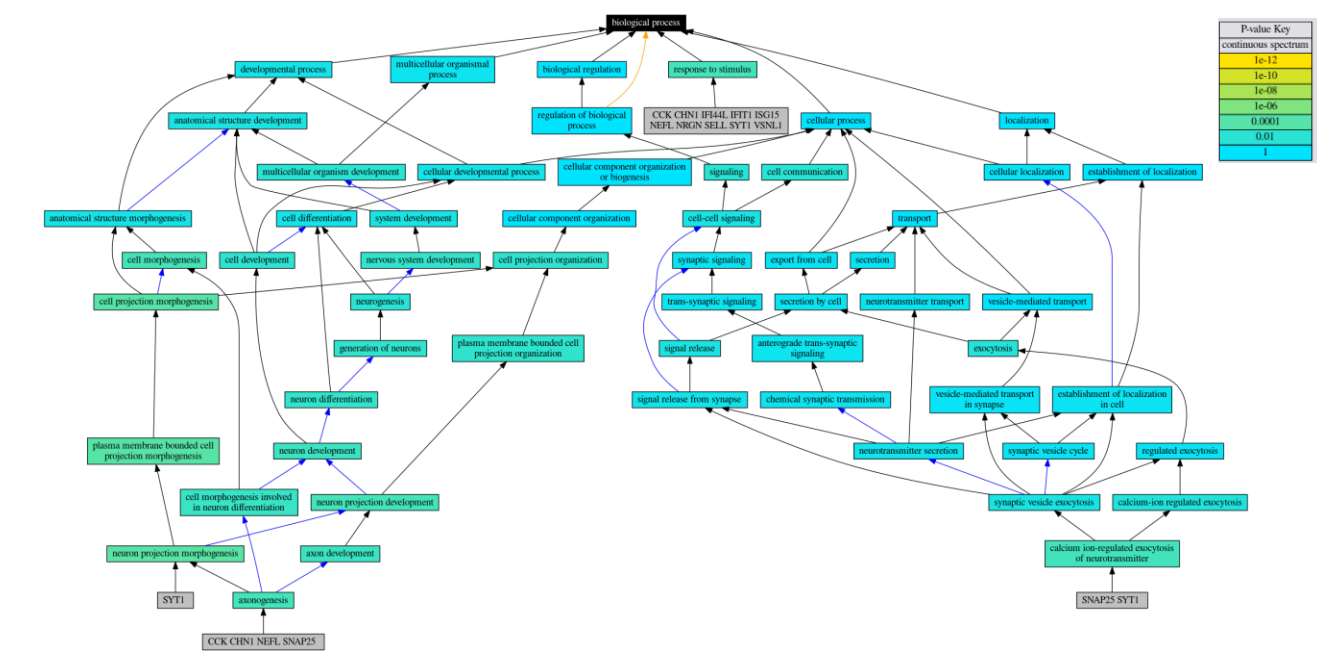

**Fig. S19.** GO analysis for biological processes output map (11 genes upregulated in LGGs C1 cluster).

Steponaitis et al. m6A-LncRNA Landscape Highlights Reduced Levels of m6A Modification in Glioblastoma as Compared to Low-Grade Glioma

**Fig. S20. (A)** Barplot illustrating the length and error rate of the RNA sequences. The first subplot shows a median read length that was sequenced. In general, no outliers are seen, which indicates that, during RNA extraction and direct RNA sequencing library preparation steps, all samples had a similar RNA fragmentation rate. Although higher variation is seen in a glioblastoma group. The second subplot shows the basecalling accuracy. Up to date, it is usual for direct RNA sequencing to produce lower basecalling accuracy, compared to DNA or non-direct RNA sequencing. A small variation between the height of each bar, and an expected basecalling score around 10, indicates that there were no major contaminants in the samples. A quality score of 10 means that there is a 1 out of 10 chance that a sequenced nucleotide was identified incorrectly. The third subplot shows the standard deviation of a read length for each sample. **(B)** Lineplot illustrating gene body coverage. The figure shows which parts of the gene were sequenced more often. This type of figure helps to better estimate RNA fragmentation. The x-axis represents a sequenced percentage of a total gene's length. Meaning that 0% of a gene body indicates the very start of a gene, or its 5'-end, while 100% of a gene body is the very end of a gene, or its 3'-end. Since direct RNA sequencing is performed from 3'-end to 5'-end, it is expected to have a higher coverage at the 3'-end of a gene. Higher verticality of a line indicates higher RNA fragmentation. A more horizontal line indicates that a higher amount of intact, full-length RNAs were sequenced. Each line in this figure indicates a unique sample - 17 glioblastoma, and 9 low-grade glioma samples.

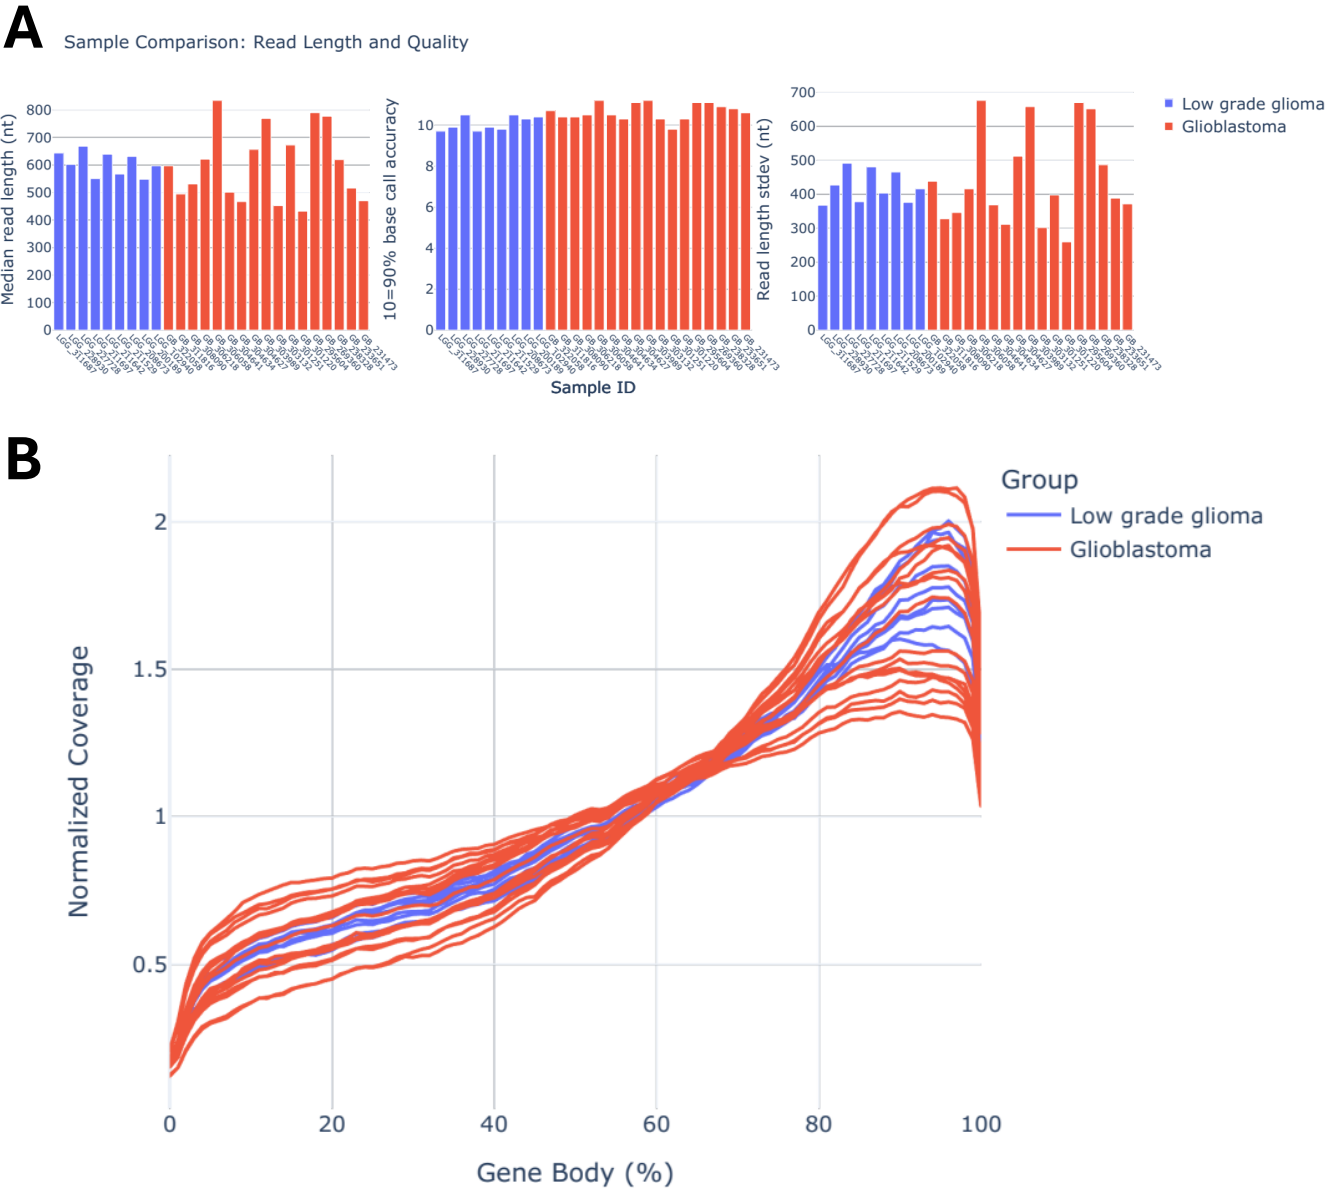

Supplement: MOESM1 [file 10020_2025_1254_MOESM1_ESM.pdf]
